# Supplementary material for: Optimized Regeneration of Petunia Protoplast and Its Association with Tissue Identity Regulators
Source: MDPI journal article supplement (doi:10.3390/horticulturae9020216), 2023-02-06
Supplement: s1 [file s1]

**Supplementary Table S1.** List of genes, designed primers, and amplicon characteristics.

| Gene name                                                     | Reference sequence accession | Arabidopsis<br>TAIR accession | Tblastx<br>e-value | Primer sequences<br>(Forward/ Reverse)<br>(5'--- 3') | Tm<br>(°C) | Amplicon<br>Length (bp) |
|---------------------------------------------------------------|------------------------------|-------------------------------|--------------------|------------------------------------------------------|------------|-------------------------|
| <i>Elongation factor 1-<br/>alpha</i> (EF1)                   | Peaxi162Scf00351g00412.1     | AT5G60390.1                   | 0.0                | CCTGGTCAGATTGGAAATGG /<br>CAGATCGCCTGTCAATCTTGG      | 60         | 103                     |
| <i>ARABIDOPSIS<br/>TRITHORAX-<br/>RELATED 2<br/>(I_ATXR2)</i> | Peinf101Scf00264g06027.1     | AT3G21820.1                   | 0.0                | CTTCAAATAAGGTTGACTGTTTGG /<br>CACTGTTTTGGGAGACACCA   | 60         | 116                     |
| <i>ARABIDOPSIS<br/>TRITHORAX 4a<br/>(A_ATX4A)</i>             | Peaxi162Scf00550g00547.1     | AT4G27910.1                   | 4e-32              | TGGACCACAGAAAGGTGTGC/<br>CTGCAGACCCATGAAGTGAA        | 62         | 145                     |
| <i>ARABIDOPSIS<br/>TRITHORAX 4b<br/>(I_ATX4B)</i>             | Peinf101Scf02092g02028.1     | AT4G27910.1                   | 1e-22              | GGACCAATGGCTTTCCGGT/<br>TTC ACATGCTCGGCAGACC         | 62         | 264                     |

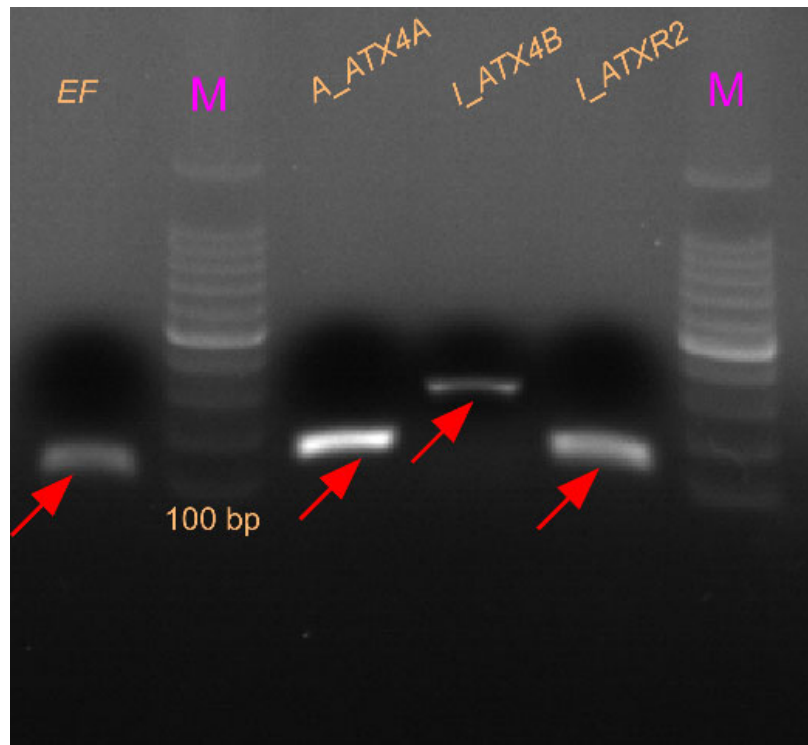

**Supplementary Figure S1.** Agarose gel electrophoresis of qRT-PCR amplicons for reference and target genes from *Petunia x hybrid*. Arrows indicate the bands amplified by designed primers. *EF* reference gene of *elongation factor 1*; *M* DNA ladder; *A\_ATX4A*, *I\_ATX4B*, and *I\_ATXR2* target genes.

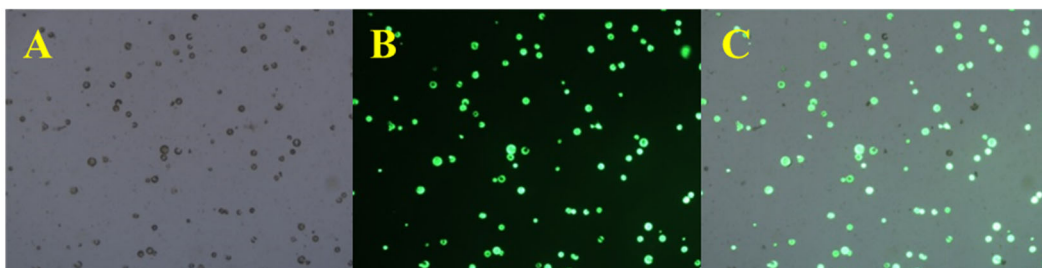

**Supplementary Figure S2.** Fluorescence microscope images collected from purified protoplast of CPW 25% sucrose solution mixed with 0.01% FDA solution. A: Protoplast stained by FDA in white light. B: Protoplast stained by FDA in green light. C: Combined A and B.
